# Supplementary material
Source: HighWire-hosted journal article supplement (doi:10.1101/rna.072975.119)
Supplement: Supplemental_Table_1.docx [file Supplemental_Table_1.docx]

**SUPPLEMENTARY Table S1**

PCR primer and oligonucleotide DNA sequences used in this study

*Spe2* UTR mapping primers

| SMART II A Oligonucleotide | 5'–AAGCAGTGGTATCAACGCAGAGTACGCGGG–3' |
| --- | --- |
| 5'-RACE CDS Primer | 5'–(T)25N-1N–3'(N = A, C, G, or T; N-1 = A, G, or C) |
| GSP（Gene specific primer） | GAGCCGAAAACCATAGTTCCAGC |
| 10× Universal Primer A Mix (UPM) Long | 5'–CTAATACGACTCACTATAGGGCAAGCAGTGGTATCAACGCAGAGT–3' |
| BcaBESTTM sequencing primer RV-M | GAGCGGATAACAATTTCACACAGG |
| BcaBESTTM sequencing primer m13-47 | CGCCAGGGTTTTCCCAGTCACG |

*Spe2* deletion PCR primers

| REPx modification F | TCGACTCTAGAACTAGTGTCGACGCATGCC |
| --- | --- |
| REPx modification R | TCGAGGCATGCGTCGACACTAGTTCTAGAG |
| SPE2 u_ forward | TCATCTGTGGTACAAGCTCG |
| SPE2 u_ reverse | GGGGATCCGTCGACCTGCAGCGGTCATACAAAGAACTTCCAATGC |
| KAN forward | GCATTGGAAGTTCTTTGTATGACCGCTGCAGGTCGACGGATCCCC |
| KAN reverse | CTAGCTGACTGTTCTCCGAACGGCCGCATAGGCCACTAGTGGATCT |
| SPE2 L_ forward | AGATCCACTAGTGGCCTATGCGGCCGTTCGGAGAACAGTCAGCTAG |
| SPE2 L_ reverse | TCGTCTGAAGATGATACCTC |

*Spe2* reporter primers

| reporter S2 F Bgl II | CATGCagatctAGCCTCAACATCATATAAAATTGGTGCGACAG |
| --- | --- |
| Spe utr R XhoI-2 | CGAATTCTCGAGAACAACAAGGGTAGGAGAC |
| rep41 sequence F | TGTCATTCGGCAATGTGCAG |
| Aru1 F1 | GATCTCTTAAGAAAGAGCAAGTATATTAATTTTCATTCCGTTTTTGAACTTGTCTTTAGTATATGCCA |
| Aru1 F2 | TTCTTTCTCTTCTTATTGAAAAGTACTCGAAAATAAAAAAAC |
| Aru1 R1 | TCGAGTTTTTTTATTTTCGAGTACTTTTCAATAAGAAGAGAAAGAATGGCATATACTAAAGACAAGTT |
| Aru1 R2 | CAAAAACGGAATGAAAATTAATATACTTGCTCTTTCTTAAGA |
| Sam1 F | CATGCAGATCTCTATAATCAGCATATAAGGC |
| Sam1 R | CAGTCCTCGAGTGGGGAATCCAAGATACTTGTAAAGG |
| Srm1 F1 | GATCTATTTGCTTGGTACTACAACCTTACTTACTTGCTTTTGTGTGTCT |
| Srm1 F2 | TTATTGTTATTTAGAAGTGAAAC |
| Srm1 R1 | TCGAGTTTCACTTCTAAATAACAATAAAGACACACAAAAGCAAGTAAGTA |
| Srm1 R2 | AGGTTGTAGTACCAAGCAAATA |
| T7 primer | TAATACGACTCACTATAGG |
| spe2 probing R | GACCTTCAAATGAGGAGGTG |

RNA preparation primers

| SPE2 forward-3 | TAATACGACTCACTATAGGAGCCTCAACATCATATAAAATTGGTGCG |
| --- | --- |
| spe2 probing R | GACCTTCAAATGAGGAGGTG |
| Spe2 reverse for mutation | GACCTTCAAATGAGGAGGTGTTAAATTCTTCCGAATTCTCTTGATCAACAACAAGGGTAGGAGAC |

Reverse transcription primers in Chemical probing

| 5’FAM labled spe2 probing R | GACCTTCAAATGAGGAGGTG |
| --- | --- |

Real-time PCR primers

| lacZ Realtime F | CTGATTACGACCGCTCACGC |
| --- | --- |
| lacZ Realtime R | AGCCAGTTTACCCGCTCTGC |
| TUBLIN Realtime F | TATCCGGCTCCTCAAGTTAG |
| TUBLIN Realtime R | CATTCAAGCTGCCCTCGAAG |
| ACTIN Realtime F | CCGGTATTCATGAGGCTACT |
| ACTIN Realtime R | GGAGGAGCAACAATCTTGAC |

Mutagenesis primers

| M1 F | TCTAGCCTCAACATCATATATTTTTGGTGCGACAGCCGCAATTAAG |
| --- | --- |
| M2 F | CATCATATAAAATTGGTGCGTCAGCCGCAATTAAGTTATT |
| M3 F | TTGGTGCGACAGCCGGAATTAAGTTATTATTTGTATGC |
| M4 F | GTGCGACAGCCGCAATTAAGTATATATTTGTATGCTTTTTTGC |
| M5 F | CCGCAATTAAGTTATTATTTCATTGCTTTTTTGCTAATAAATATCC |
| M6 F | GCAATTAAGTTATTATTTGTTACCTTTTTTGCTAATAAATATCC |
| M7 F | CAGCCGCAATTAAGTTATTATTTCTATGCTTTTTTGCTAATAAAT |
| M8 F | GTTATTATTTGTATGCTTTTTTGCATATAAATATCCTAAAAGTGTAAC |
| M9 F | CAGCCGCAATTAAGTTATTATTTGAATGCTTTTTTGCTAATAAAT |
| M10 F | CTAAAAGTGTAACTGGAGTAACTAGCTAGTACGTGTTTTG |
| M11 F | AGTGTAACTGGAGCAACTAATTAGTACGTGTTTTGGGAAT |
| M12 F | AGCAACTAGCTAGTACGTGTAAAGGGAATTACACTCACAGCGCAC |
| M13 F | CGTGTTTTGGGAATTACACTGTCAGCGCACATATAGCATTGGA |
| M14 F | TTGGGAATTACACTCATAGCGCACATATAGCATTGGA |
| M15 F | GAATTACACTCACAGCGAACATATAGCATTGGAAGT |
| M16 F | GGAATTACACTCACAGCGCACATAAAGCATTGGAAGTTCTTTGTATG |
| M17 F | CACTCACAGCGCACATATACGATTGGAAGTTCTTTGTATGAC |
| M18 F | CTCACAGCGCACATATAGCATACGAAGTTCTTTGTATGACTAT |
| M19 F | CAGCGCACATATAGCATTGGTTGTTCTTTGTATGACTATATTC |
| M20 F | AGCGCACATATAGCATTGGAGATTCTTTGTATGACTATATTC |
| M21 F | CGCACATATAGCATTGGAAGAACTTTGTATGACTATATTCTA |
| M22 F | ATAGCATTGGAAGTTCTTTGCATGACTATATTCTAAAATGTCTC |
| M23 F | CATTGGAAGTTCTTTGTATGTGTATATTCTAAAATGTCTCCTA |
| M24 F | CAGCCGCAATTAAGTTATTAAAAGTATGCTTTTTTGCTAATAAATATCC |
| M25 F | GTTATTATTTGTATGCTAAAATGCTAATAAATATCCTA |
| M26 F | GTATGCTTTTTTGCTAATAAATATGGTAAAAGTGTAACTGGAGCAAC |
| M27 F | CTAAAAGTGTAACTGGAGCATGTAGCTAGTACGTGTTTTGGGA |
| M28 F | CATATAGCATTGGAAGTTCTTACTATGACTATATTCTAAAATGTC |
| M29 F | TAGCATTGGAAGTTCTTTGTTACACTATATTCTAAAATGTCTCC |
| M30 F | TCTTTGTATGACTATATTCTTTTATGTCTCCTACCCTTGTTGT |
| M31 F | CATGCAGATCTAGCCTCAACATCTAATAAAATTGGTGCGACAG |
| M32 F | CATCATATAAAATTGGTGCGACTCCCGCAATTAAGTTATTATTTG |
| M33 F | GTGCGACAGCCGCAATTAACATATTATTTGTATGCTTTTTTGC |
| M34 F | TTGTATGCTTTTTTGCTAATTTTTATCCTAAAAGTGTAACTGG |
| M35 F | CTTTTTTGCTAATAAATATCCTATTTGTGTAACTGGAGCAACTAGC |
| M36 F | CTAATAAATATCCTAAAAGTGTAAGAGGAGCAACTAGCTAGTACGTG |
| M37 F | ACTAGCTAGTACGTGTTTTGCCAATTACACTCACAGCGCACA |
| M38 F | GCTAGTACGTGTTTTGGGAAAAACACTCACAGCGCACATATAG |
| M39 F | GTTTTGGGAATTACACTCACAATGCACATATAGCATTGGAAGT |
| M40 F | GAATTACACTCACAGCGCTGATATAGCATTGGAAGTT |
| M41 F | CTCACAGCGCACATATAGCAAAGGAAGTTCTTTGTATGACTA |
| M42 F | CAATTAAGTTATTATTTGTATGTTGTTTTGCTAATAAATATCC |
| M43 F | GCAATTAAGTTATTATTTGTATGTTGTTCTGCTAATAAATATCCTA |
| M44 F | CAATTAAGTTATTATTTGTATGTTGTTCTGTTAATAAATATCCTAAAAGTG |
| M45 F | GTTATTATTTGTATGCTTTTCTGTTAATAAATATCCTAAAAG |
