# Supplementary material
Source: HighWire-hosted journal article supplement (doi:10.1101/rna.072975.119)
Supplement: Supplemental_Table_2.docx [file Supplemental_Table_2.docx]

**SUPPLEMENTARY Table S2**

Neutral Mutants

|  | Mutant | Position | Induction | Basal level expression |
| --- | --- | --- | --- | --- |
| WT | WT |  | 5.83 |  |
| Neutral Mutants | M1 | 18-20 A---U | 5.27 | Generally, the basal level expression of these mutants is close to that in the wild type (miller unit around 60). |
| M2 | 29 A-U | 6.14 |
| M3 | 36 C-G | 5.15 |
| M4 | 45-47 UAU-AUA | 4.09 |
| M5 | 53 G to C | 4.64 |
| M6 | 53-55 GUA to CAU | 4.41 |
| M7 | 55-57 AUG to UAC | 3.63 |
| M8 | 67-68 UA to AU | 3.29 |
| M9 | 96 C---U | 3.83 |
| M10 | 102-103 GC-AU | 6.91 |
| M11 | 114-116 UUU to AAA | 4.56 |
| M12 | 129-130 CA-GU | 3.47 |
| M13 | 131 C---U | 3.01 |
| M14 | 136 C---A | 4.22 |
| M15 | 142 U to A | 4.35 |
| M16 | 144-145 GC-CG | 5.79 |
| M17 | 148-149 UG to AC | 5.27 |
| M18 | 151-152 AA to UU | 4.57 |
| M19 | 152-153 AG to GA | 3.91 |
| M20 | 154-155 UU to AA | 7.04 |
| M21 | 161 U to C | 5.04 |
| M22 | 163 U to 163C | 4.58 |
| M23 | 165-166 AC-UG | 3.46 |

Disruptive Mutants

|  | Mutant | Position | Induction | Basal level expression |
| --- | --- | --- | --- | --- |
| Disruptive Mutants | M24# | 50-52 UUU-AAA | 1.37 | Generally, the basal level expression of these mutants is at least 1.5-fold (miller unit <40) lower than that in the wild type. Note: * represents mutant sequences which may generate potential uORFs.  # represents mutant sequences that alter the sequence context of neighbouring uORFs 1&2, or the main ORF |
| M25* | 60-63 4U to 4A | 1.76 |
| M26* | 77-78 CC to GG | 2.83 |
| M27* | 98-99 AC-UG | 2.05 |
| M28# | 159-160 UG to AC | 2.66 |
| M29 | 162-164 AUG to UAC | 2.25 |
| M30# | 175-177 AAA to UUU | 3.15 |
| M31 | 13-14 AU to UA | 3.34 |
| M32 | 31-32 AG-UC | 5.26 |
| M33 | 43-44 GU-CA | 4.38 |
| M34 | 71-73 AAA-UUU | 2.33 |
| M35 | 81-83 A---U | 5.95 |
| M36 | 90-91 CU_GA | 5.54 |
| M37 | 118-119 GG to CC | 3.48 |
| M38 | 122-123 UU-AA | 4.71 |
| M39 | 133-134 GC-AU | 1.95 |
| M40 | 137-138 AC-UG | 7.42 |
| M41 | 147-148 UU-AA | 6.10 |
